# Supplementary material
Source: Elsevier journal article supplement (https://www.sciencedirect.com/science/article/pii/S0210569122002935)
Supplement: mmc1 [file S0210569122002935:mmc1.doc]

Adquirir conocimientos teóricos y prácticos sobre el concepto y diagnóstico de muerte por criterios neurológicos. 
Adquirir conocimientos teóricos y prácticos sobre las diferentes modalidades de donación por criterios cardiocirculatorios (donación en asistolia) y sus sistemas de preservación. 
Adquirir conocimientos teóricos y prácticos para la selección y mantenimiento del donante de órganos y tejidos. 
Adquirir habilidades que permitan aplicar los conocimientos teóricos sobre fundamentos bioéticos en los cuidados al final de la vida. 
Adquirir conocimientos teóricos y prácticos para los Cuidados Intensivos Orientados a la Donación.
Conocer los modelos organizativos de trasplante, programas de donación y mantenimiento de los potenciales donantes. 
Adquirir conocimientos teóricos y prácticos sobre el manejo postoperatorio en la UCI de pacientes trasplantados de órganos sólidos. 
Adquirir habilidades que permitan aplicar los conocimientos teóricos en la asistencia clínica diaria de pacientes trasplantados. 
